# Supplementary material for: Enantioselectivity of Pentedrone and Methylone on Metabolic Profiling in 2D and 3D Human Hepatocyte-like Cells
Source: MDPI journal article supplement (doi:10.3390/ph15030368), 2022-03-17
Supplement: s1 [file s1]

# Enantioselectivity of Pentedrone and Methylone on Metabolic Profiling in 2D and 3D Human Hepatocyte-like Cells

Bárbara Silva <sup>1,2,3,\*</sup>, Joana Saraiva Rodrigues <sup>4</sup>, Ana Sofia Almeida <sup>3</sup>, Ana Rita Lima <sup>1,2</sup>,  
Carla Fernandes <sup>3,5</sup>, Paula Guedes de Pinho <sup>1,2</sup>, Joana Paiva Miranda <sup>4,†</sup> and Fernando Remião <sup>1,2,\*</sup>

<sup>1</sup> Associate Laboratory i4HB—Institute for Health and Bioeconomy, Faculdade de Farmácia, Universidade do Porto, Rua Jorge Viterbo Ferreira, 228, 4050-313 Porto, Portugal; ritacmlima@hotmail.com (A.R.L.); pguedes@ff.up.pt (P.G.d.P.)

<sup>2</sup> UCIBIO-REQUIMTE, Laboratório de Toxicologia, Departamento de Ciências Biológicas, Faculdade de Farmácia, Universidade do Porto, Rua Jorge Viterbo Ferreira, 228, 4050-313 Porto, Portugal

<sup>3</sup> Laboratório de Química Orgânica e Farmacêutica, Departamento de Ciências Químicas, Faculdade de Farmácia, Universidade do Porto, Rua de Jorge Viterbo Ferreira, 228, 4050-313 Porto, Portugal; up201605043@edu.ff.up.pt (A.S.A.); cfernandes@ff.up.pt (C.F.)

<sup>4</sup> Research Institute for Medicines (iMed), Faculdade de Farmácia, Universidade de Lisboa, Avenida Professor Gama Pinto, 1649-003 Lisboa, Portugal; joana.s.rodrigues@campus.ul.pt (J.S.R.); jmiranda@ff.ulisboa.pt (J.P.M.)

<sup>5</sup> Centro Interdisciplinar de Investigação Marinha e Ambiental (CIIMAR), Universidade do Porto, Avenida General Norton de Matos, 4450-208 Matosinhos, Portugal

\* Correspondence: barbarapolerisilva@gmail.com (B.S.); remiao@ff.up.pt (F.R.)

† These authors contributed equally to this work.

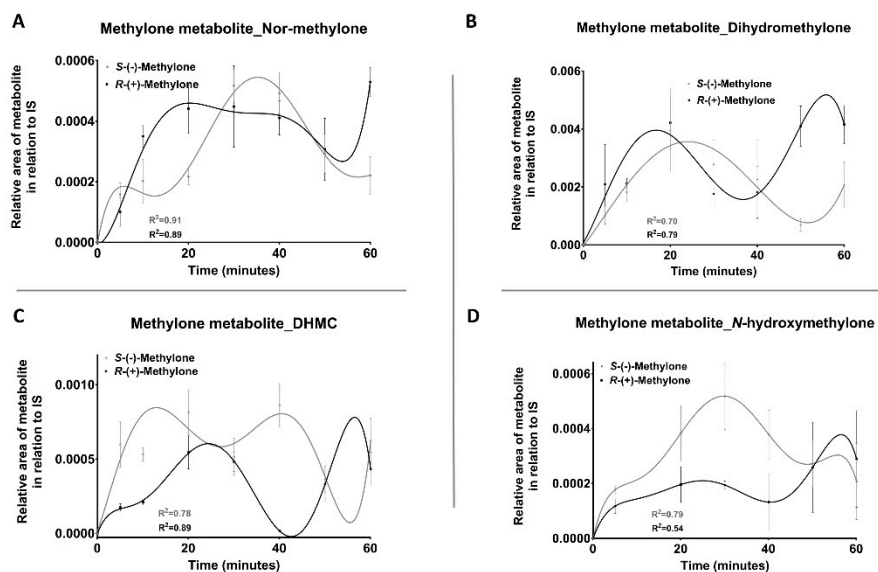

**Figure S1.** Methylone metabolites (nor-methylone, DHMC, *N*-hydroxymethylone and dihydromethylone) produced over the time after incubation with microsomes (1 mg/mL). Data is presented as average  $\pm$  SD ( $n=2$ ). Polynomial regression was used to fit the curves (Nor-methylone, DHMC and *N*-hydroxymethylone: Centered sixth order; Dihydromethylone: Centered fifth order).

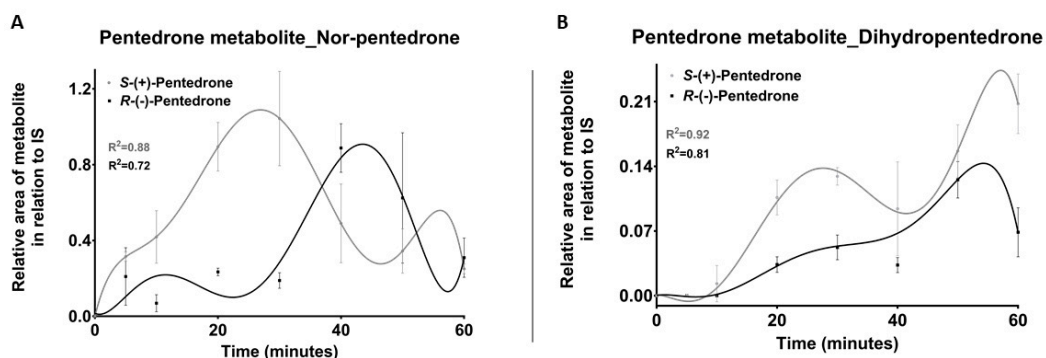

**Figure S2.** Pentedrone metabolites (nor-pentedrone and dihydropentedrone) produced over the time after incubation with microsomes (1 mg/mL). Data is presented as average  $\pm$  SD ( $n=2$ ). Centered sixth order polynomial regression were used to fit the curves.

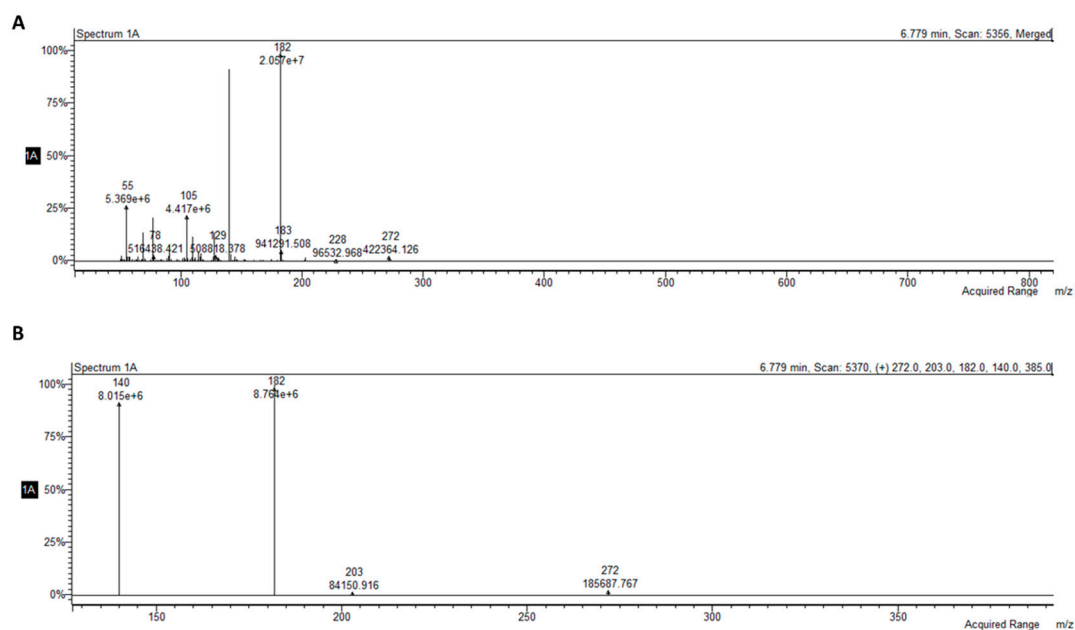

**Figure S3.** GC-MS spectrum of dihydropentedrone in (A) Full Scan and (B) SIM mode.

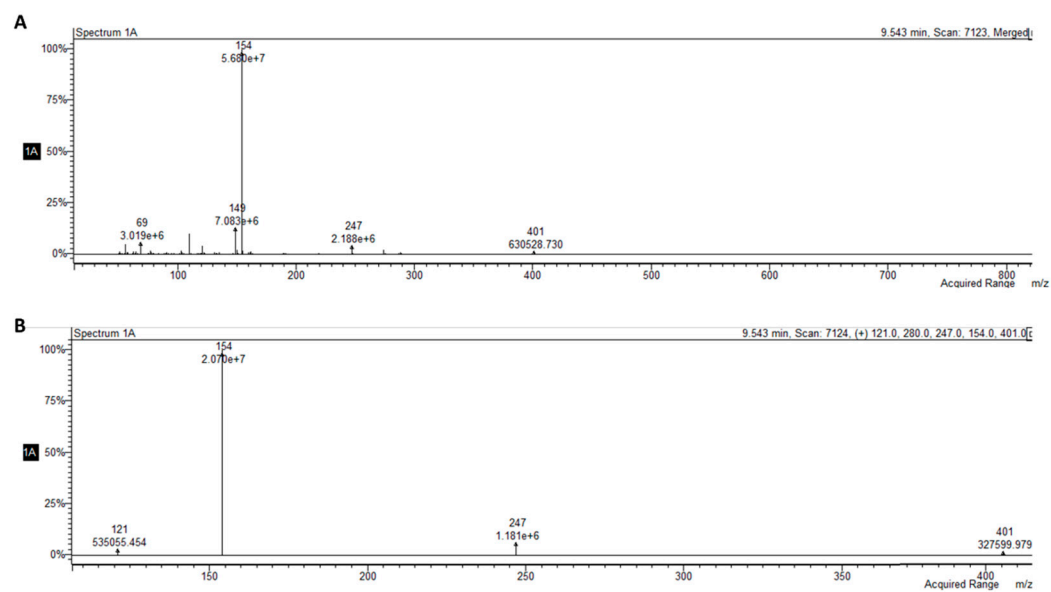

**Figure S4.** GC-MS spectrum of dihydromethylone in (A) Full Scan and (B) SIM mode.

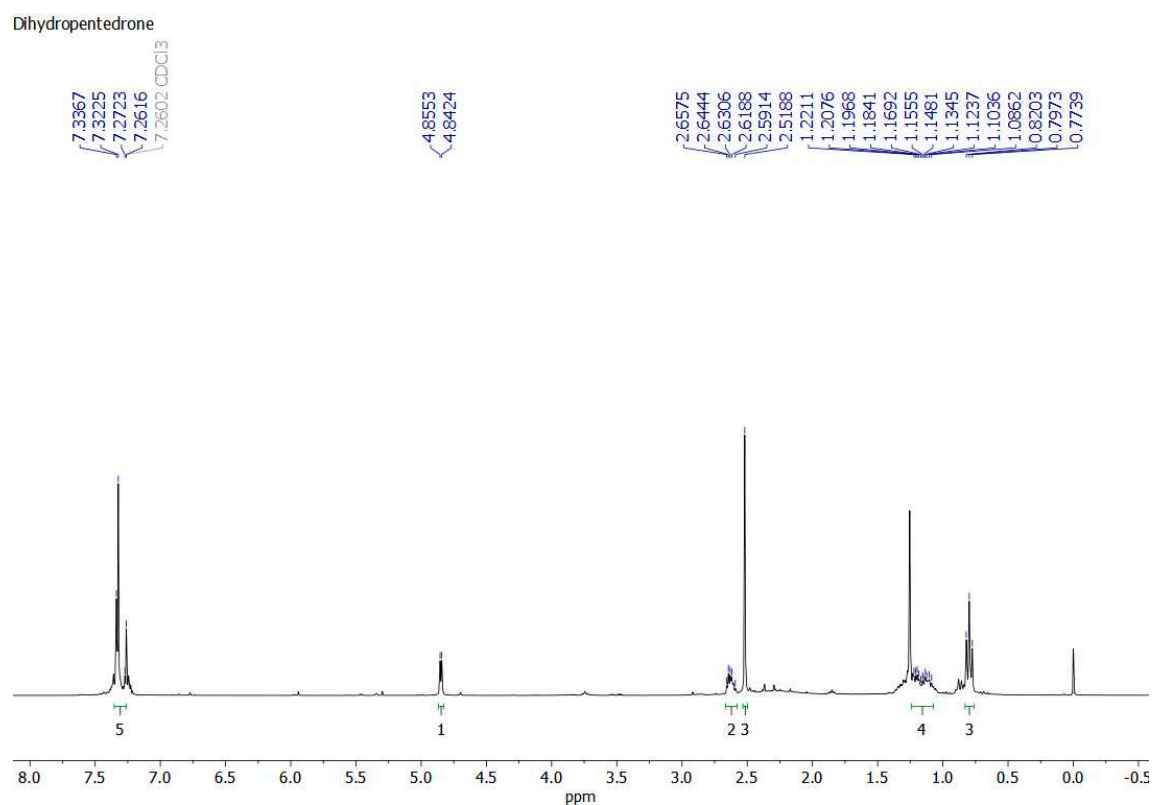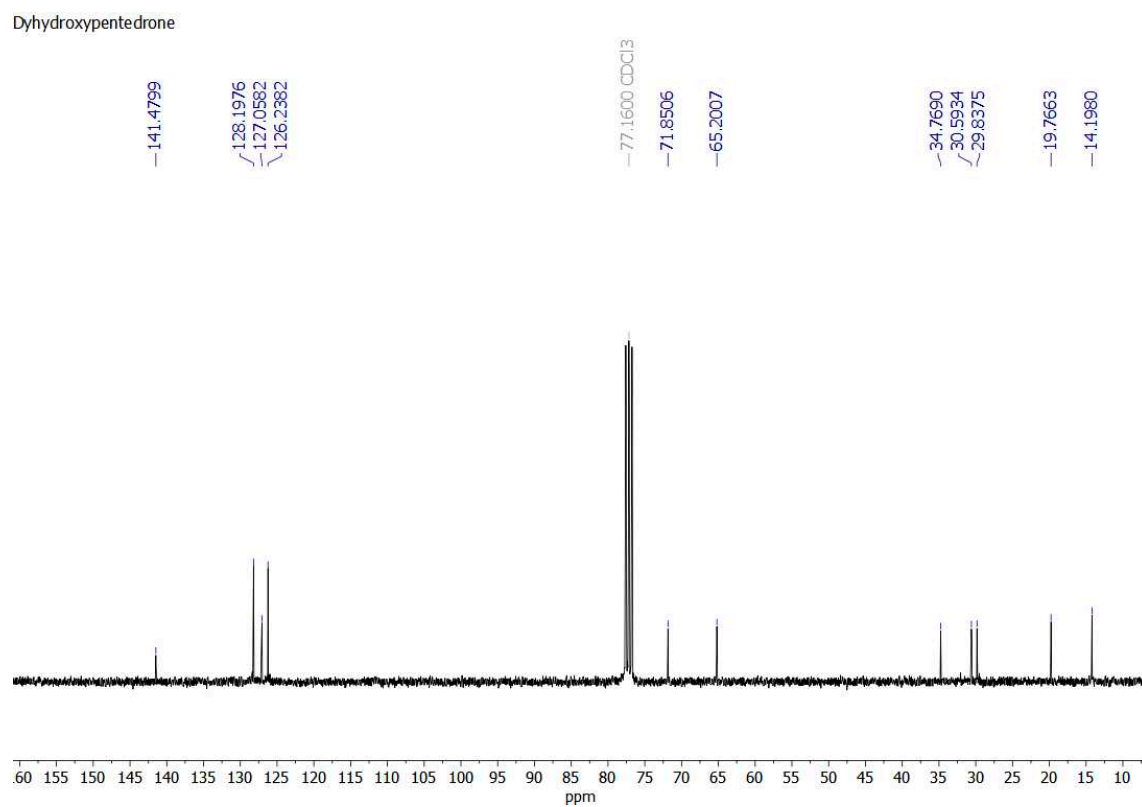

**Figure S5.**  $^1\text{H}$  NMR (300.13 MHz,  $\text{CDCl}_3$ ) and  $^{13}\text{C}$  NMR (75.48 MHz,  $\text{DMSO}-d_6$ ) for dihydromethylone.

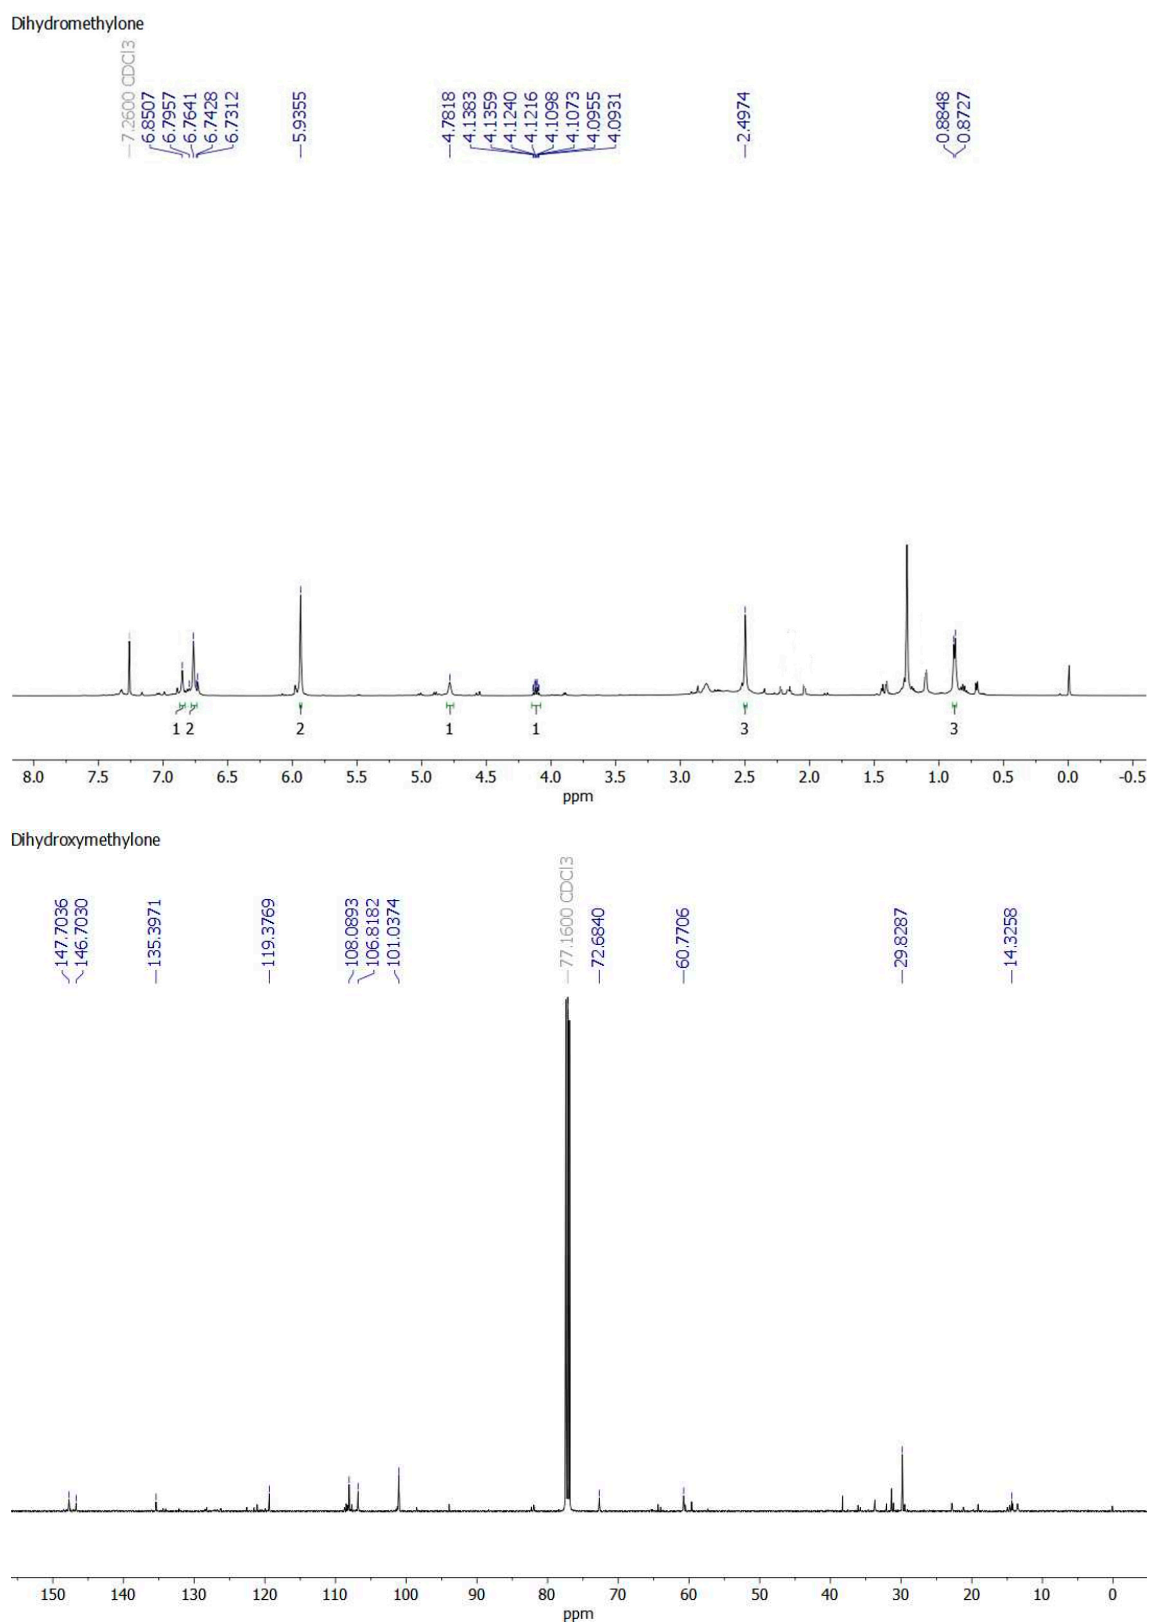

**Figure S6.**  $^1\text{H}$  NMR (300.13 MHz,  $\text{CDCl}_3$ ) and  $^{13}\text{C}$  NMR (75.48 MHz,  $\text{DMSO}-d_6$ ) for dihydropentedrone.
